# Supplementary material for: Impedance spectroscopic detection of binding and reactions in acid-labile dielectric polymers for biosensor applications
Source: Royal Society of Chemistry journal article supplement (doi:10.1039/c7tb03171h), 2018-01-01

Impedance Spectroscopic Detection of Binding and Reactions in Acid-Labile Dielectric  
Polymers for Biosensor Applications

Jennifer Dailey, Michelangelo Fichera, Ellen Silbergeld, Howard Katz

Supplementary Information

SI 1: (a)-(d) GPC of all polymers and analysis 1mg/ml in THF.

(a) PolyBMMMA

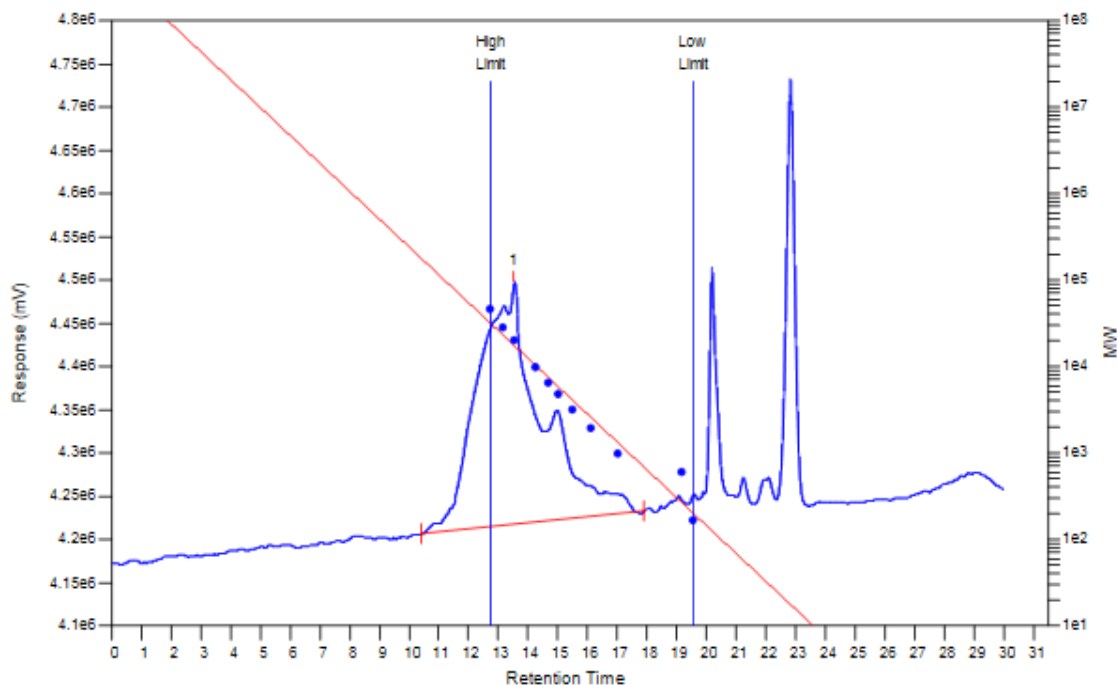

**MW Averages**

| Peak No | Mp    | Mn    | Mw    | Mz    | Mz+1  | Mv    | PD      |
|---------|-------|-------|-------|-------|-------|-------|---------|
| 1       | 17728 | 10052 | 24194 | 40796 | 59341 | 22014 | 2.40688 |

**Processed Peaks**

| Peak No | Name | Start RT (mins) | Max RT (mins) | End RT (mins) | Pk Height (mV) | % Height | Area (mV.secs) | % Area |
|---------|------|-----------------|---------------|---------------|----------------|----------|----------------|--------|
| 1       |      | 10.43           | 13.51         | 17.89         | 280609         | 0        | 4.20277e+007   | 100    |

(b) PolyBMTTrM

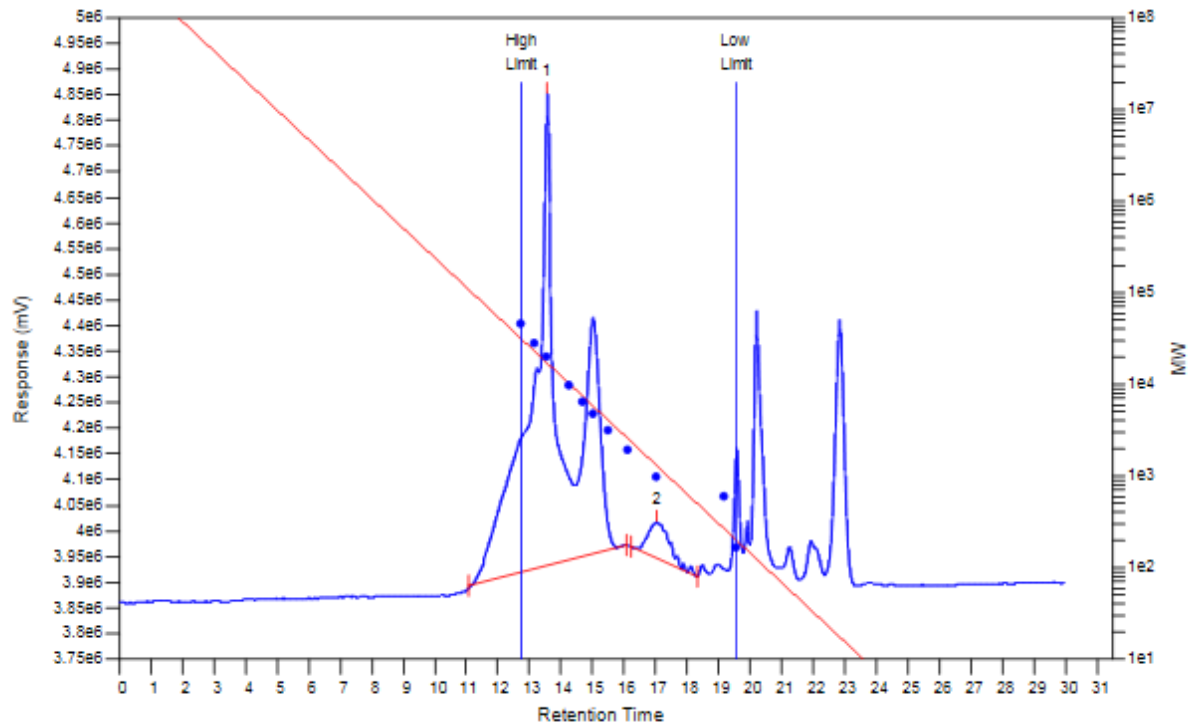

**MW Averages**

| Peak No | Mp    | Mn    | Mw    | Mz    | Mz+1  | Mv    | PD      |
|---------|-------|-------|-------|-------|-------|-------|---------|
| 1       | 17467 | 12550 | 20666 | 31938 | 43905 | 19223 | 1.64669 |
| 2       | 1307  | 1152  | 1232  | 1303  | 1366  | 1221  | 1.06944 |

**Processed Peaks**

| Peak No | Name | Start RT (mins) | Max RT (mins) | End RT (mins) | Pk Height (mV) | % Height | Area (mV.secs) | % Area  |
|---------|------|-----------------|---------------|---------------|----------------|----------|----------------|---------|
| 1       |      | 11.09           | 13.53         | 16.08         | 921581         | 92.883   | 6.51088e+007   | 95.0462 |
| 2       |      | 16.25           | 17.02         | 18.33         | 70614.9        | 7.11703  | 3.39346e+006   | 4.95379 |

(c) PolyBMMTrM

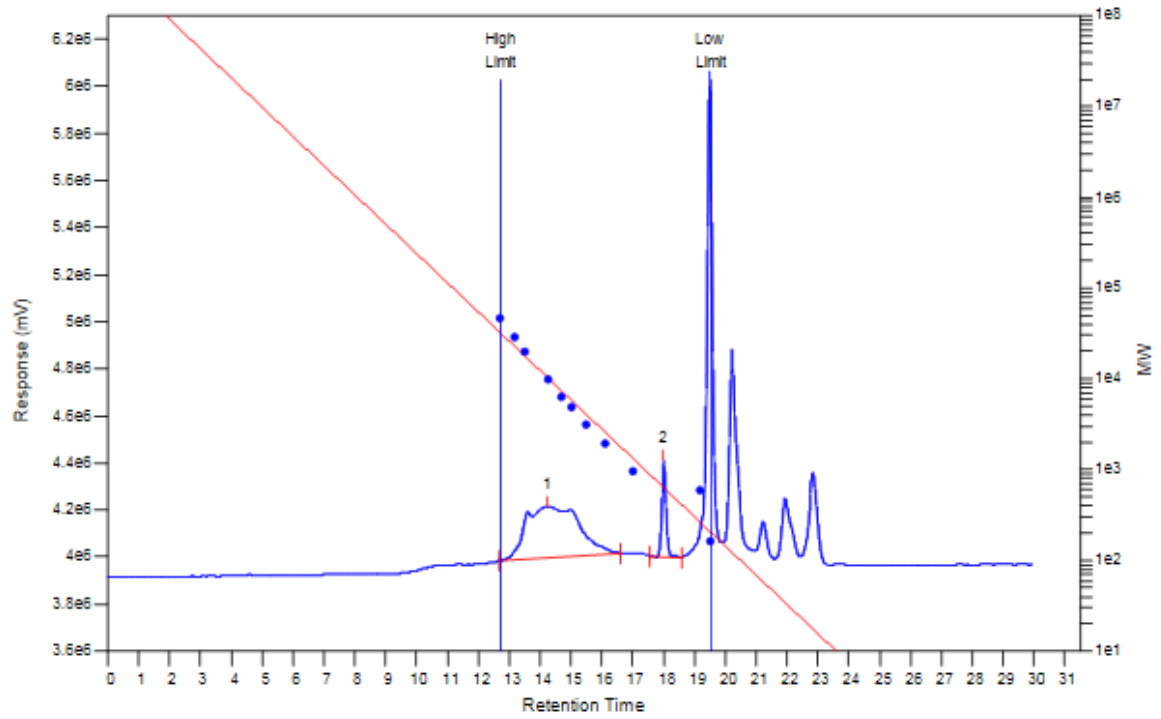

**MW Averages**

| Peak No | Mp    | Mn   | Mw    | Mz    | Mz+1  | Mv   | PD      |
|---------|-------|------|-------|-------|-------|------|---------|
| 1       | 10493 | 7703 | 10104 | 12600 | 14845 | 9737 | 1.3117  |
| 2       | 641   | 635  | 637   | 639   | 641   | 637  | 1.00315 |

**Processed Peaks**

| Peak No | Name | Start RT (mins) | Max RT (mins) | End RT (mins) | Pk Height (mV) | % Height | Area (mV.secs) | % Area  |
|---------|------|-----------------|---------------|---------------|----------------|----------|----------------|---------|
| 1       |      | 12.68           | 14.23         | 16.61         | 218795         | 34.6508  | 2.61754e+007   | 85.8781 |
| 2       |      | 17.55           | 17.99         | 18.57         | 412634         | 65.3492  | 4.30433e+006   | 14.1219 |

(d) PolyBMDTrM

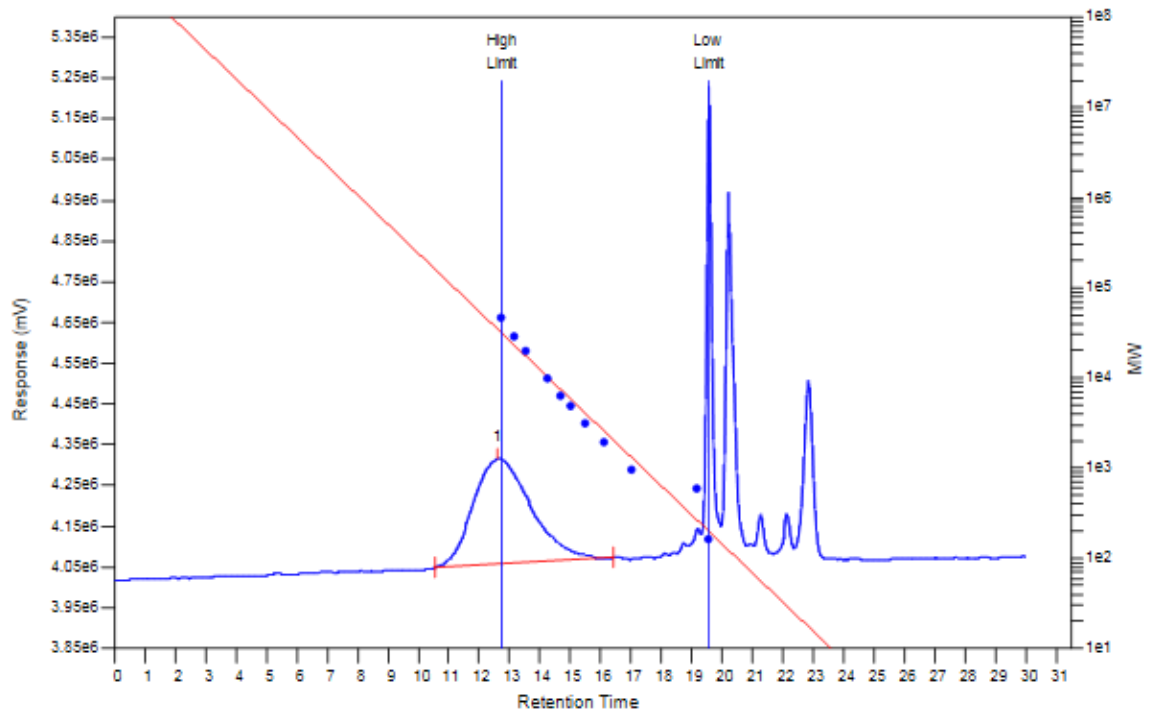

**MW Averages**

| Peak No | Mp    | Mn    | Mw    | Mz    | Mz+1  | Mv    | PD      |
|---------|-------|-------|-------|-------|-------|-------|---------|
| 1       | 35089 | 23019 | 35722 | 49748 | 63798 | 33770 | 1.55185 |

**Processed Peaks**

| Peak No | Name | Start RT (mins) | Max RT (mins) | End RT (mins) | Pk Height (mV) | % Height | Area (mV.secs) | % Area |
|---------|------|-----------------|---------------|---------------|----------------|----------|----------------|--------|
| 1       |      | 10.53           | 12.60         | 16.41         | 258997         | 0        | 3.41479e+007   | 100    |

SI 2: (a)-(f) Proton NMR of each monomer and polymer. Trityl Methacrylate polymer

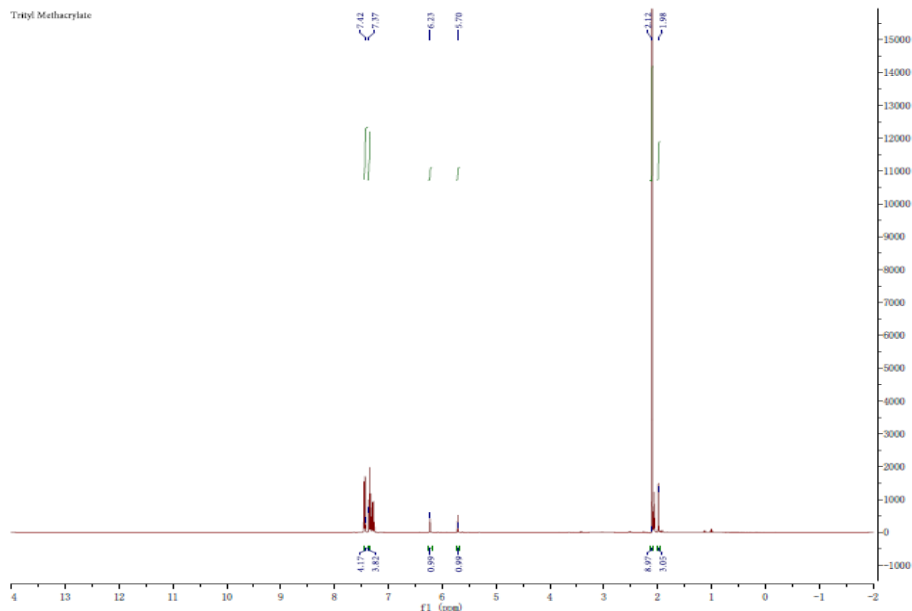

a.) Monomethoxytrityl Methacrylate- We see the methoxy group located near 3.8.

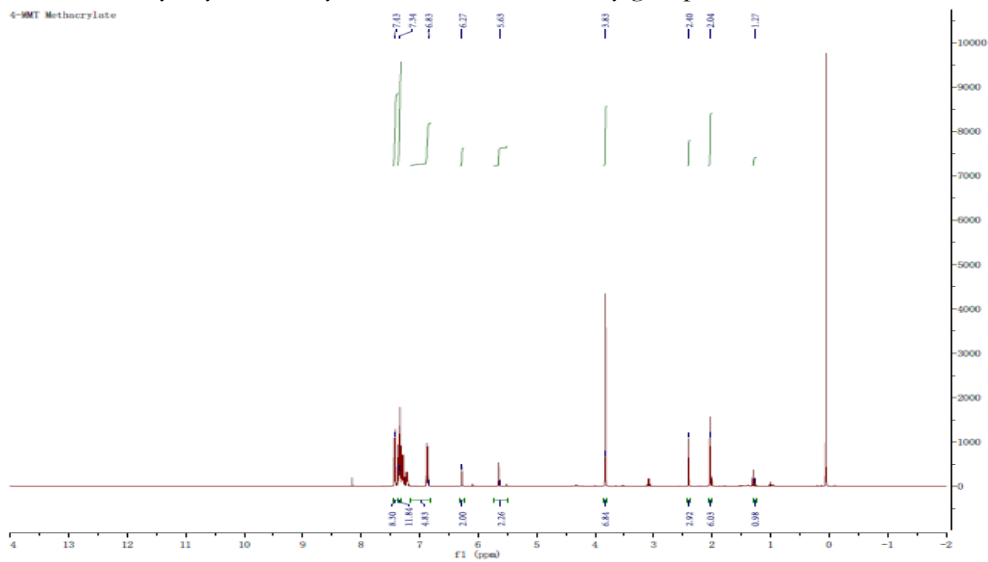

b.) Dimethoxytrityl Methacrylate- The methoxy group at 3.8 doubles due to there being twice as many groups

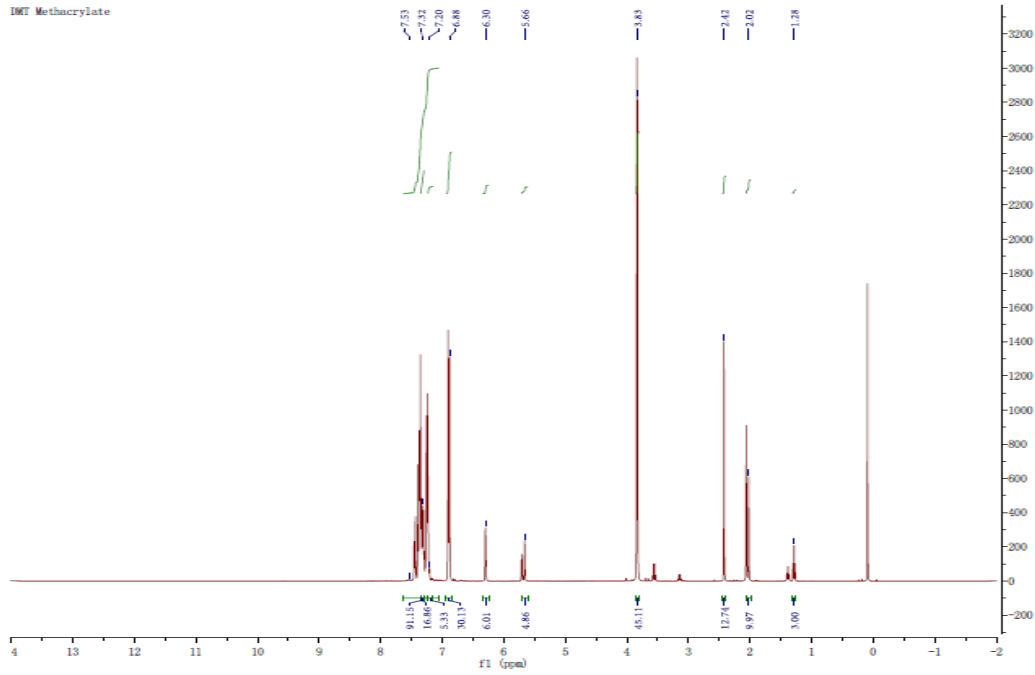

c.) PolyBMTrM- We compare the number of methyl groups to the quantity of trityl so that we can determine the percentage of each monomer.

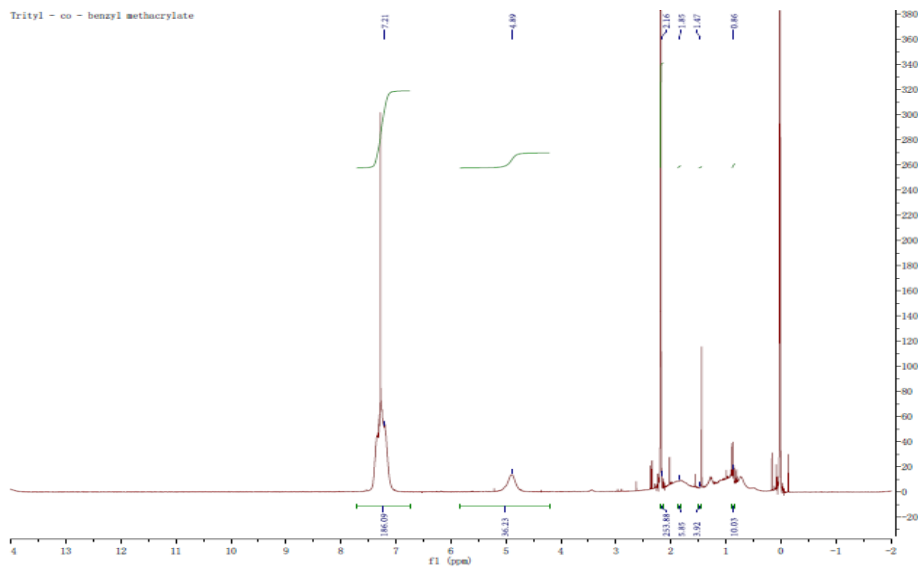

d.) PolyBMMTrM- We can see the small 3.8 peak indicating the methoxy group, its size is correlated to the amount of monomer successfully included in the polymer.

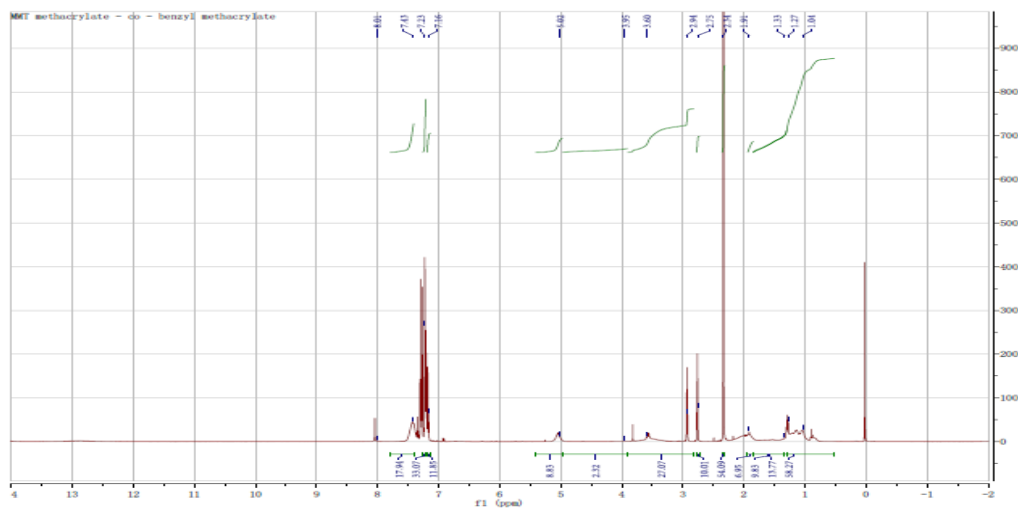

e.) PolyBMDTrM- We can compare the methoxy group peak to the benzyl methacrylate to find the percentage of monomer incorporated.

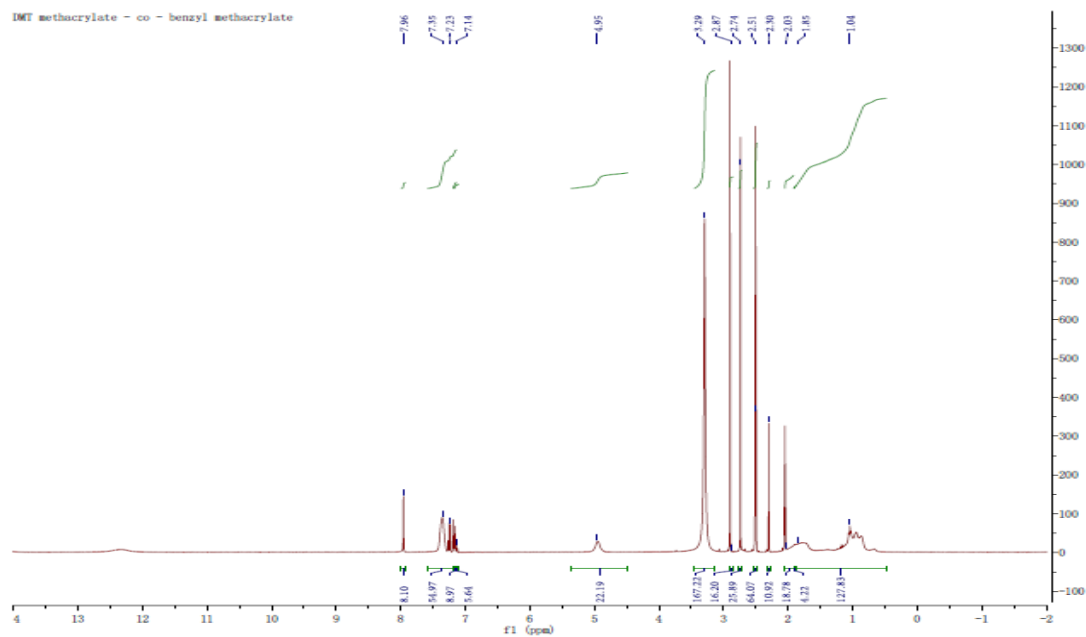

SI 3 (Left) 3D image of DMT-based polymer exposed to pH 7.4 buffer. (Right) DIC image of same. Though not flat, this demonstrates that there is no pitting through the surface, but rather there are some small imperfections on top of the film.

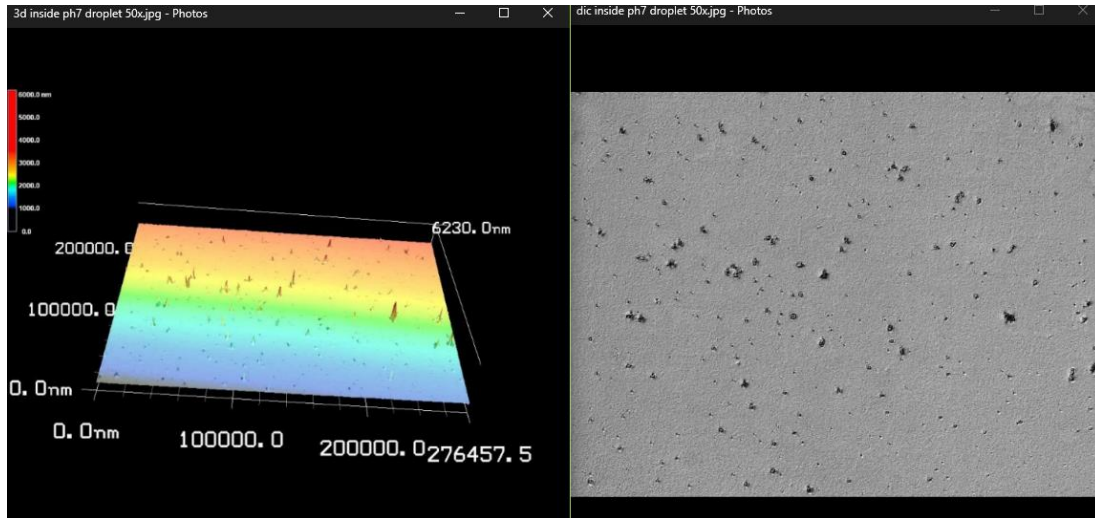

Supplement: c7tb03171h1.pdf [file c7tb03171h1.pdf]
